# Supplementary material
Source: MDPI journal article supplement (https://www.mdpi.com/2673-4931/19/1/27)
Supplement: s1 [file s1]

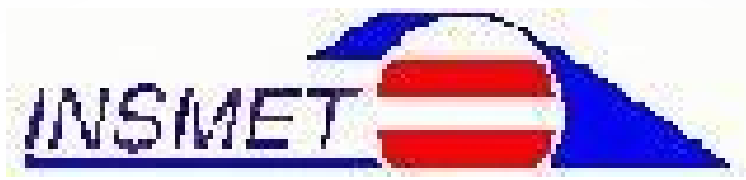

# **Tropical Waves and Their Transit through Cuba during the Period 2012-2020.**

**Authors:**

**Laura E. Guerra Rodríguez<sup>1</sup>**

*[laurardguez1999@gmail.com](mailto:laurardguez1999@gmail.com)*

**Miguel A. Hernández Martínez<sup>1</sup>**

*[miguel.hernandez@insmet.cu](mailto:miguel.hernandez@insmet.cu)*

**Evelio A. García Valdés<sup>1</sup>**

*[evelio.garcia@insmet.cu](mailto:evelio.garcia@insmet.cu)*

<sup>1</sup>**National Forecast Center, Meteorology Institute of Cuba, Casablanca Hill,  
Regla, 11700, Havana, Cuba**

# Tropical Waves and Their Transit through Cuba during the Period 2012-2020.

**Rainy  
Period**

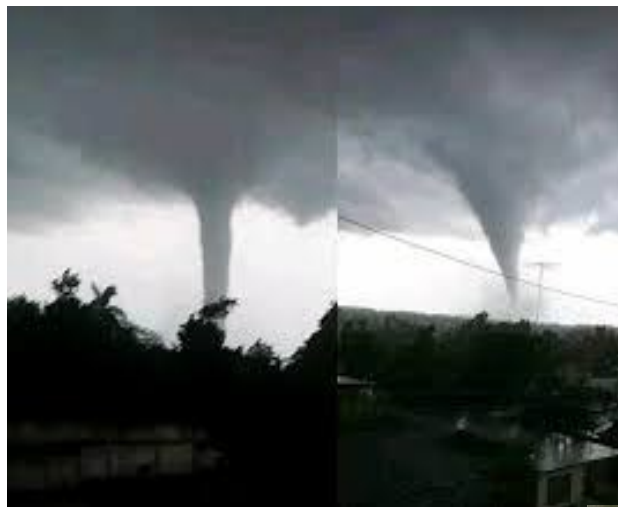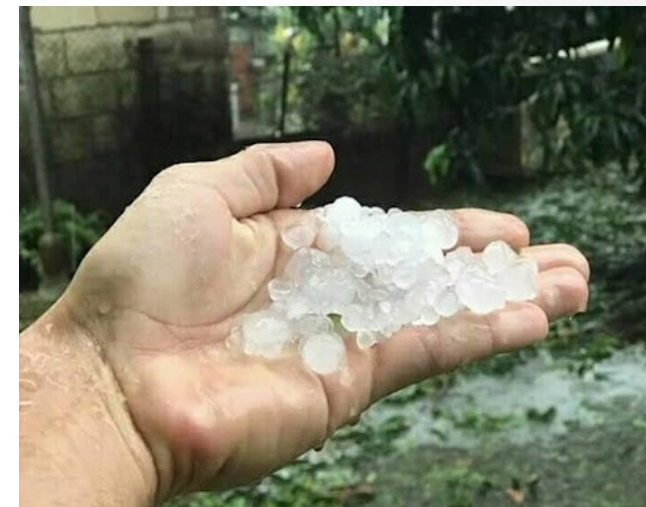

**Tropical  
Waves**

- Rains and/or severe weather
- Tropical Cyclones

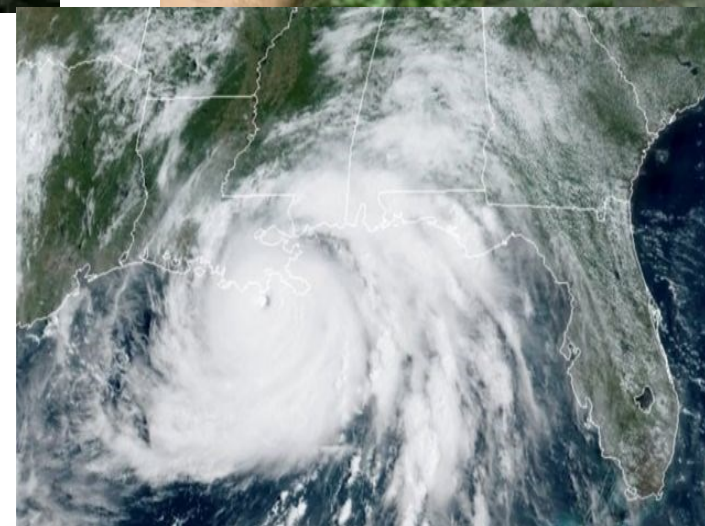

## Abstract

Fundamentally, during the rainy season, the transit of tropical waves through the seas adjacent to the Cuban archipelago occurs, stimulating deep convection and later the occurrence of severe local storms; that is why the general objective is to analyze the behavior of the tropical waves that passed through Cuba during the 2012-2020 period. This research will examine the most relevant characteristics of tropical waves, the associated dangerous phenomena and the number of intensifications or dissipations that occurred after passing through the country. The results obtained contribute to the expansion of knowledge on Tropical Meteorology and to a better effectiveness in the meteorological forecast related to these systems.

**Keywords:** tropical wave, rainy period, severe local storm, intense rain.



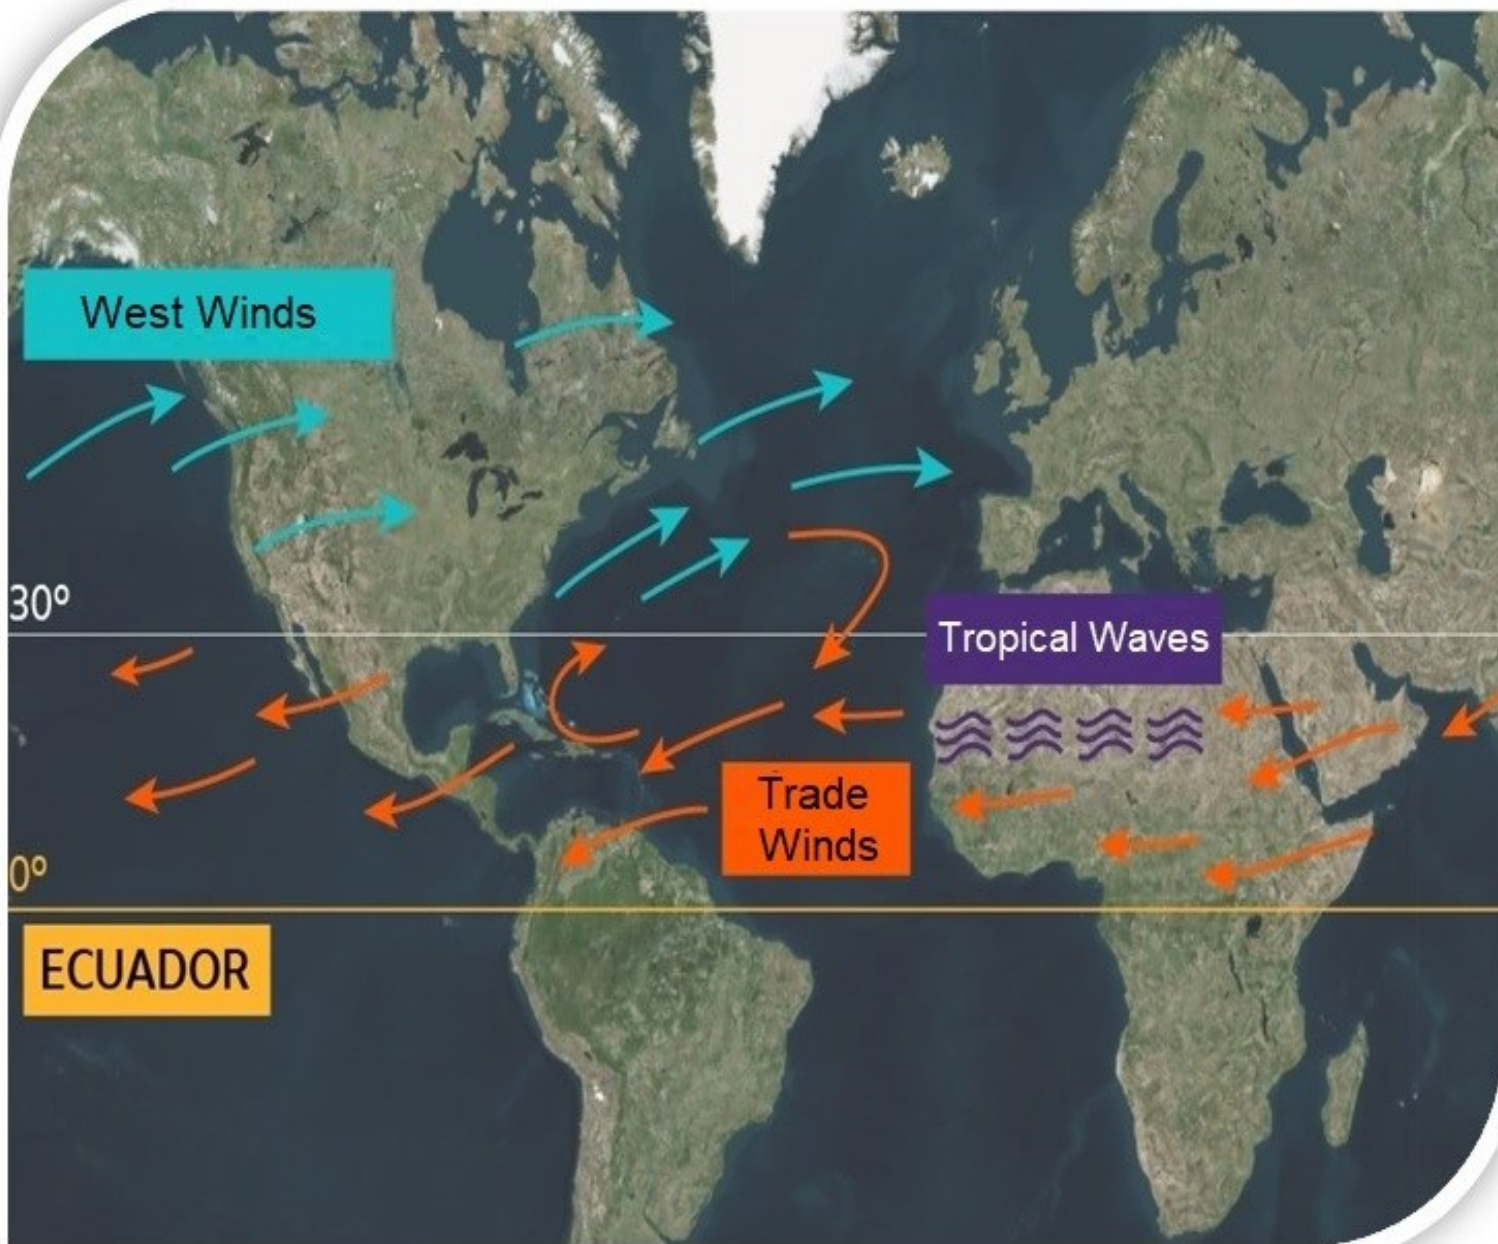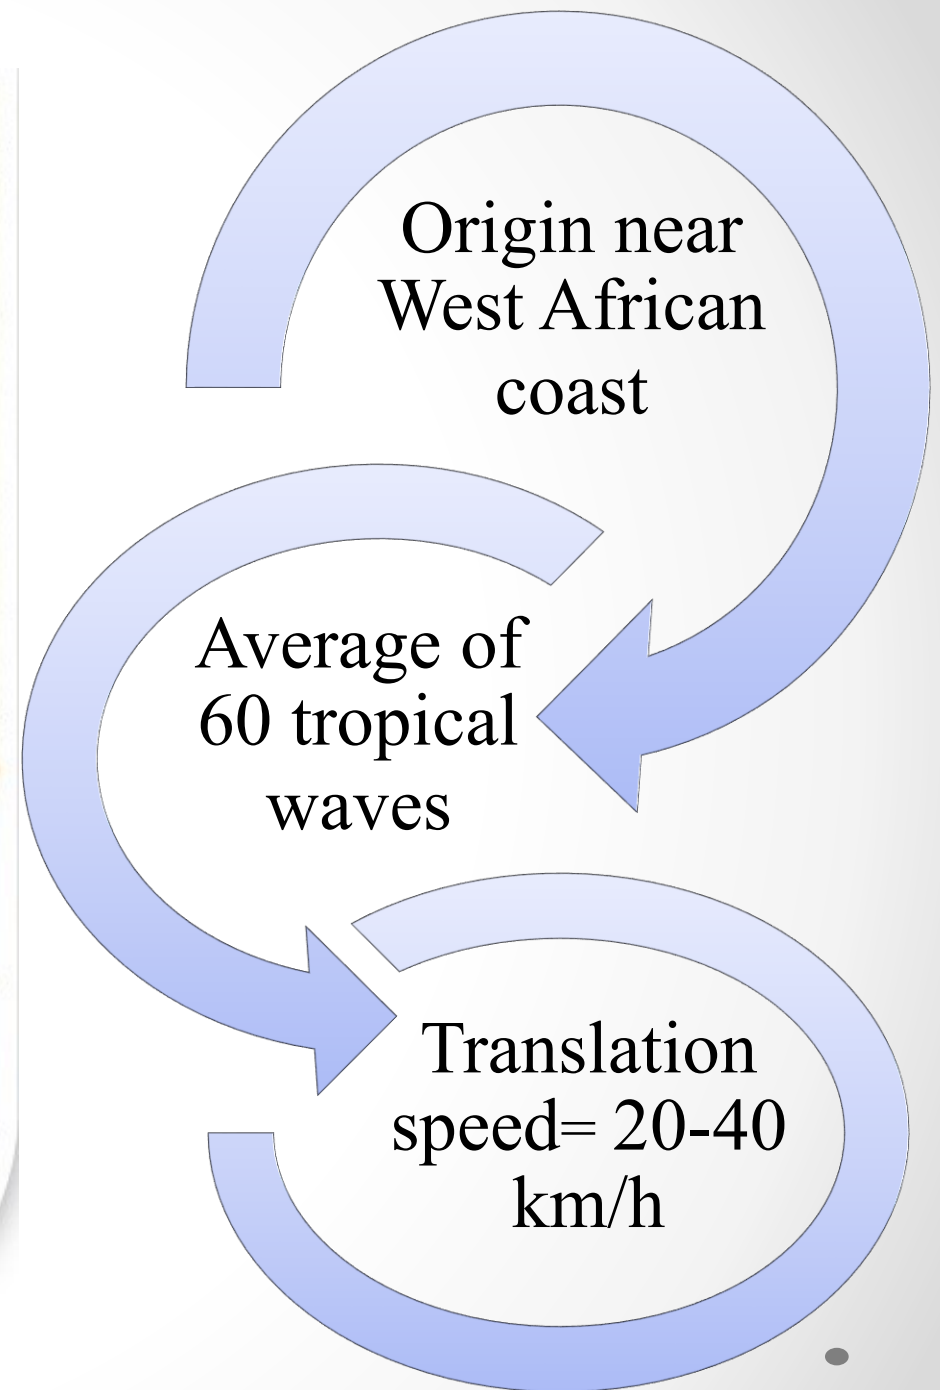

# Formation, intensification and dissipation zones

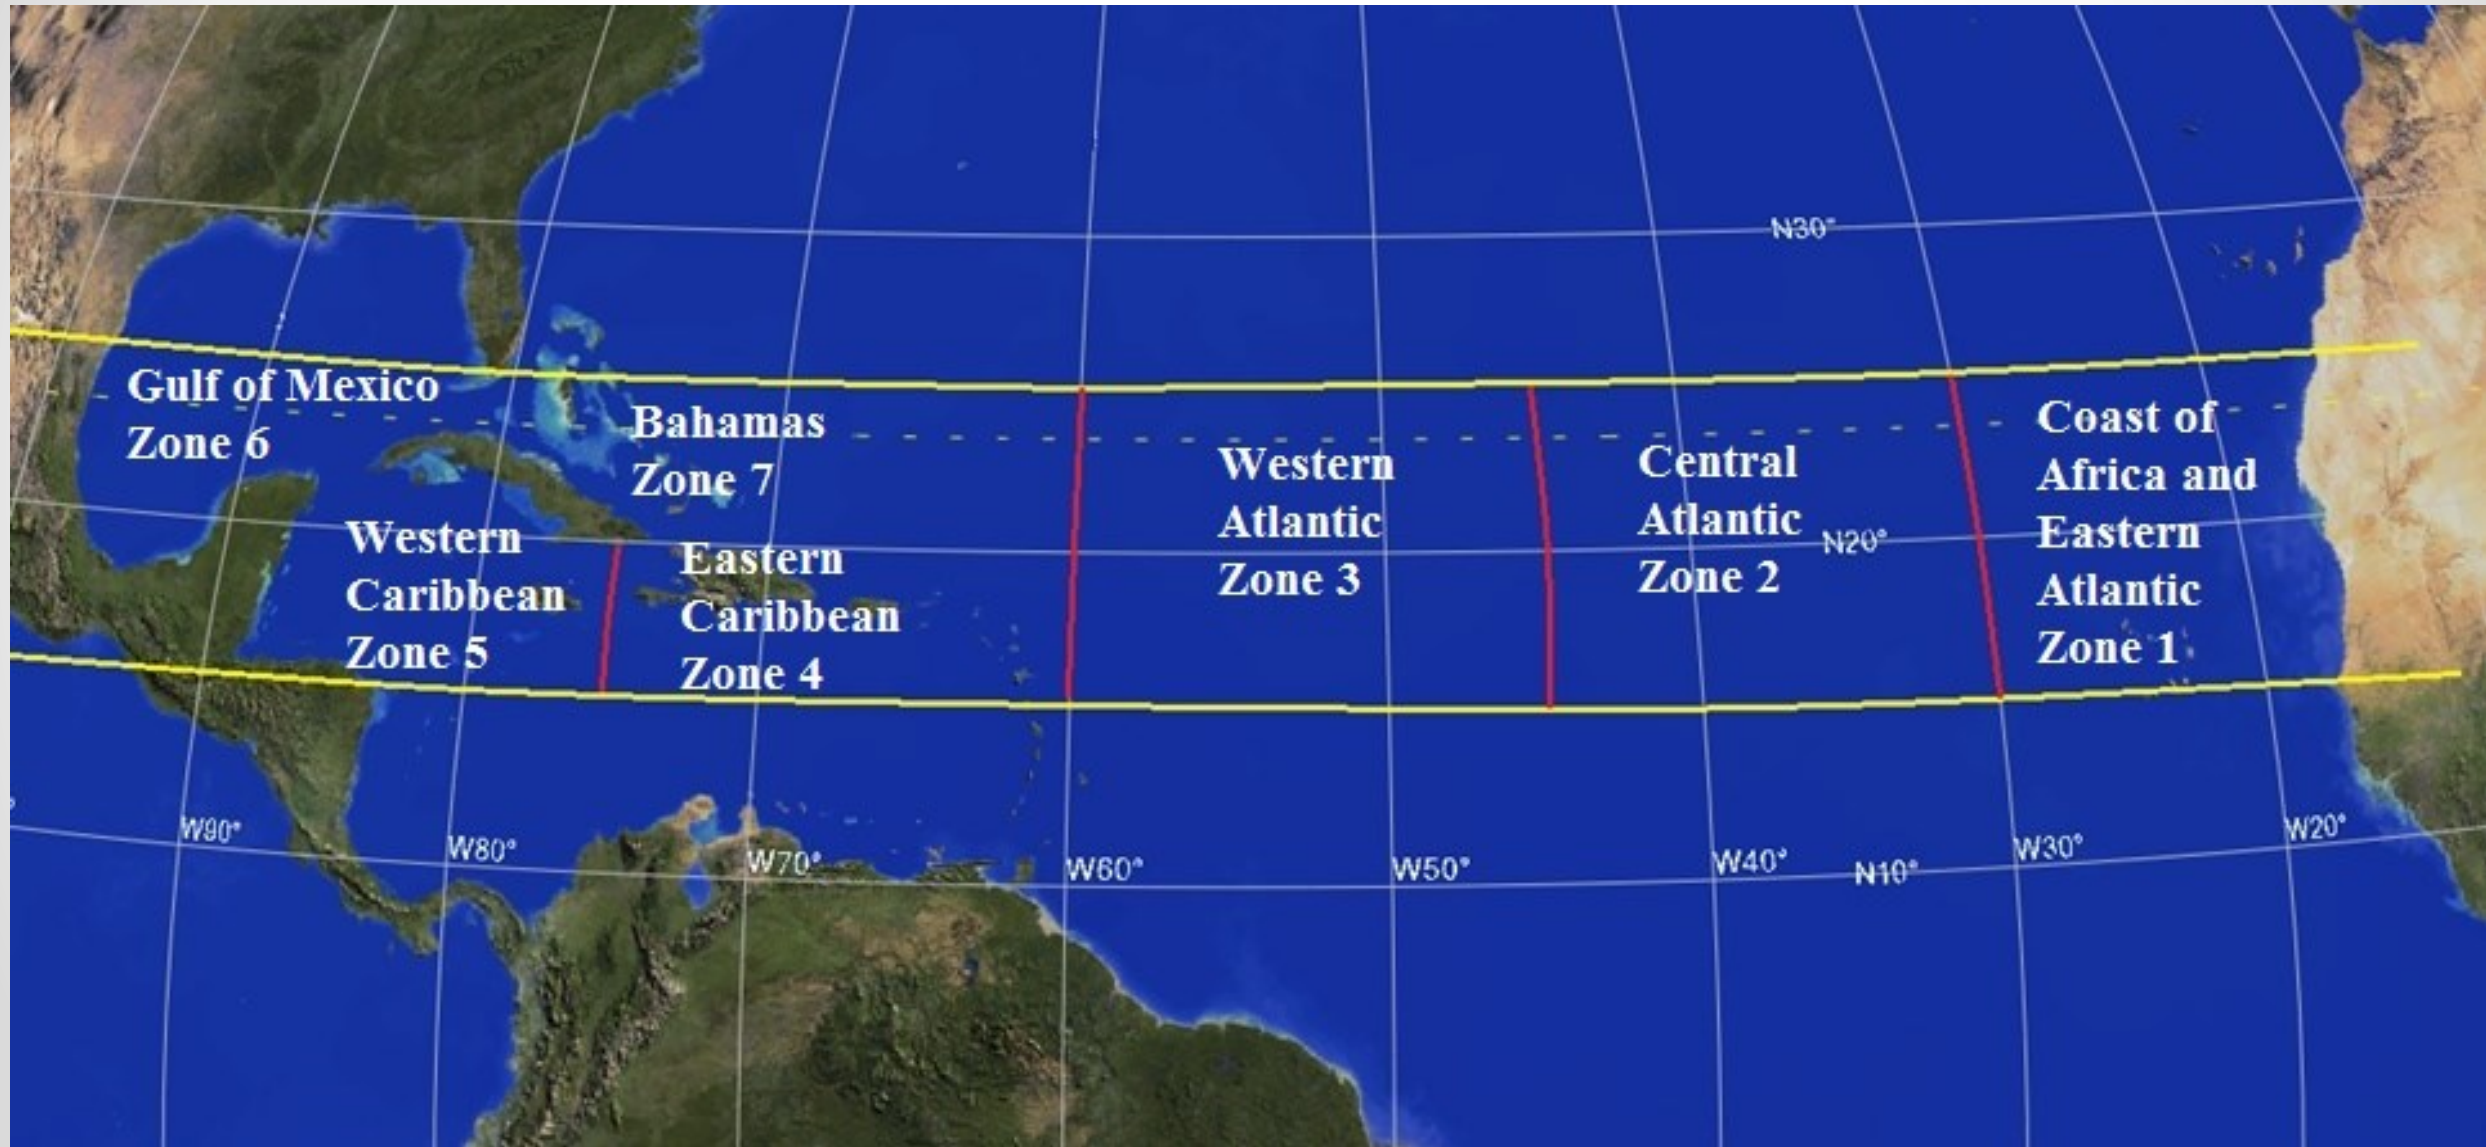

# Rankings

## **Traslation speed**

- Slow ( $<15$  km/h)
- Normal (15-25 km/h)
- Fast ( $>25$  km/h)

## **Convective activity**

- Active
- Inactive



# Data Processing

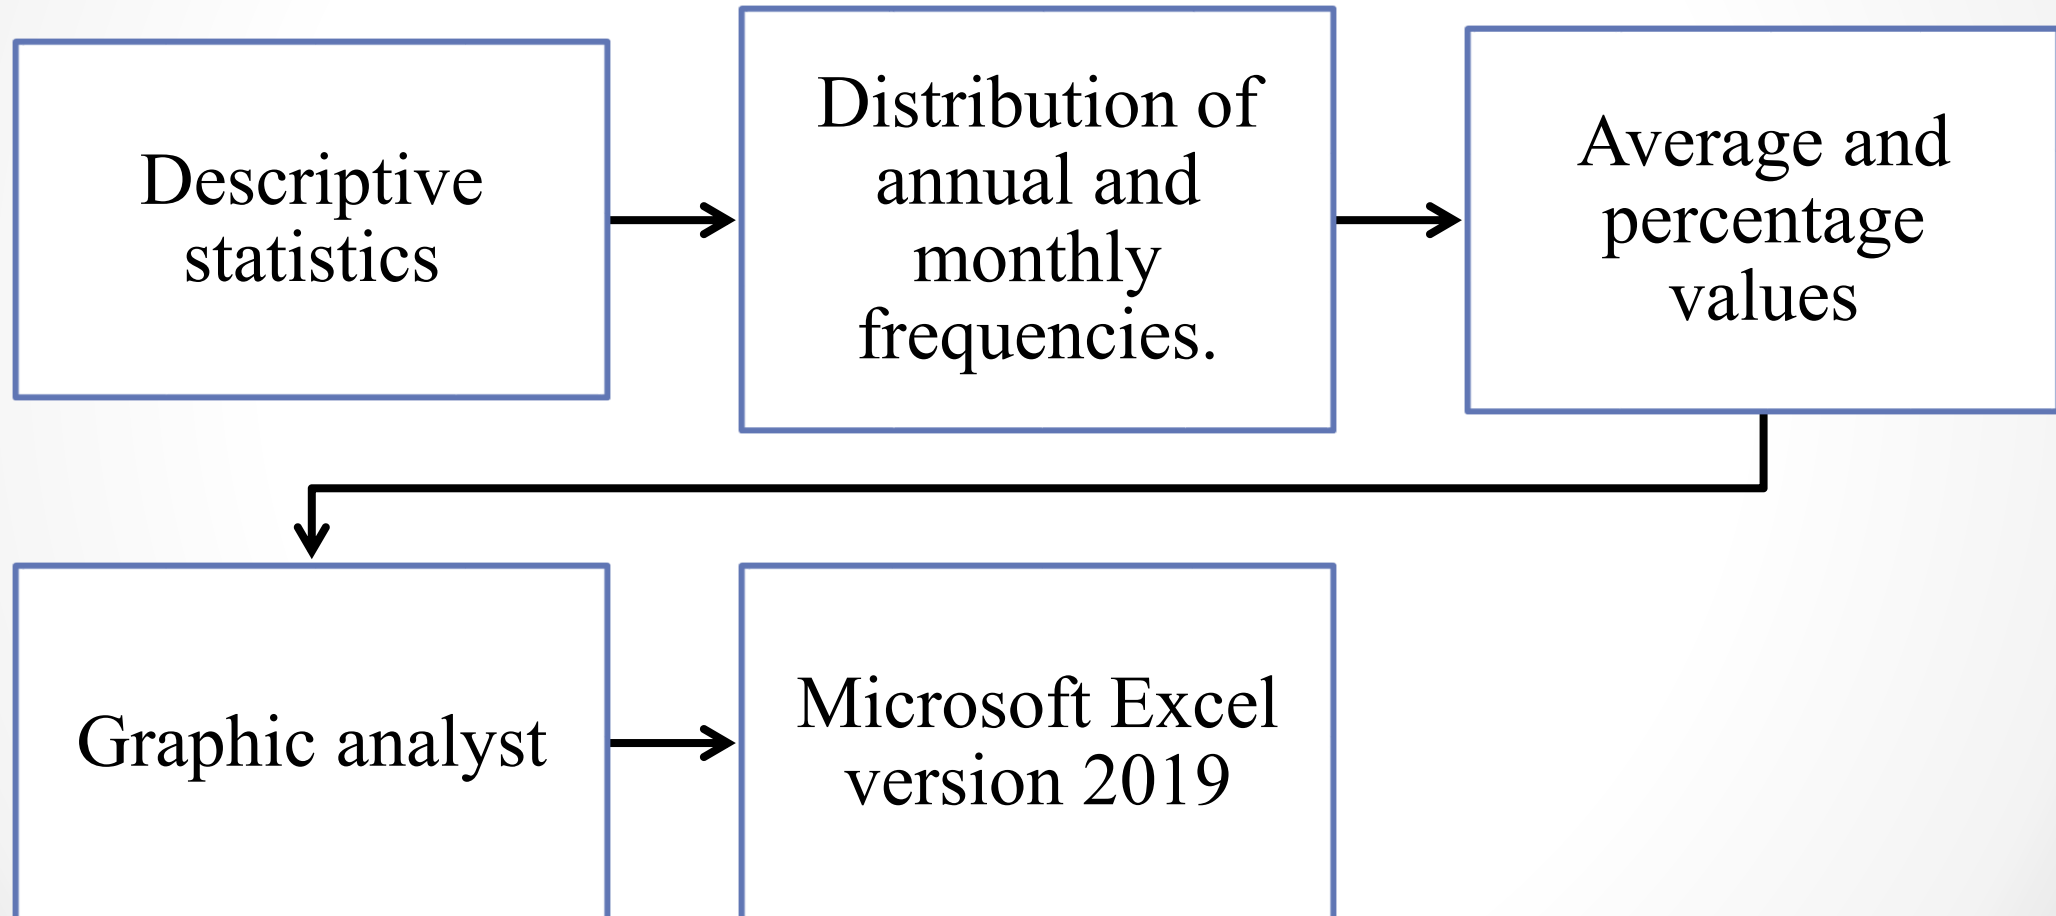

# Annual distribution of tropical waves in Cuba

**Total= 323 tropical waves**

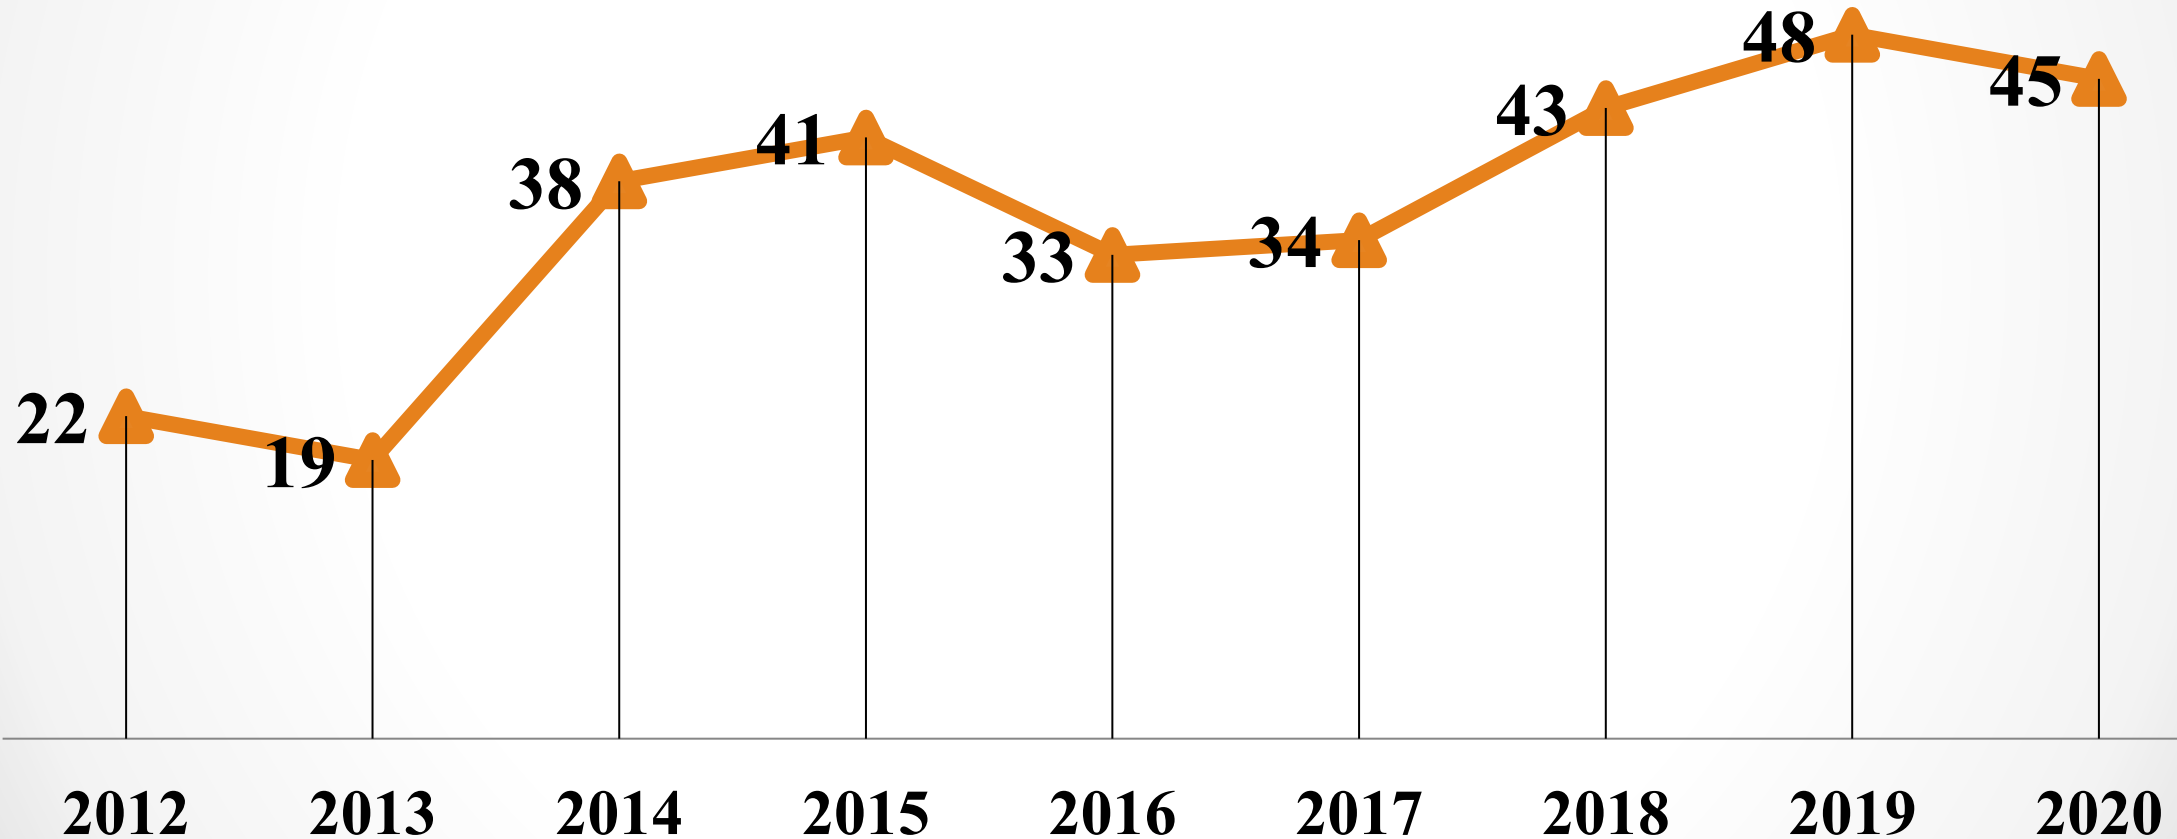



# Monthly distribution of tropical waves in Cuba

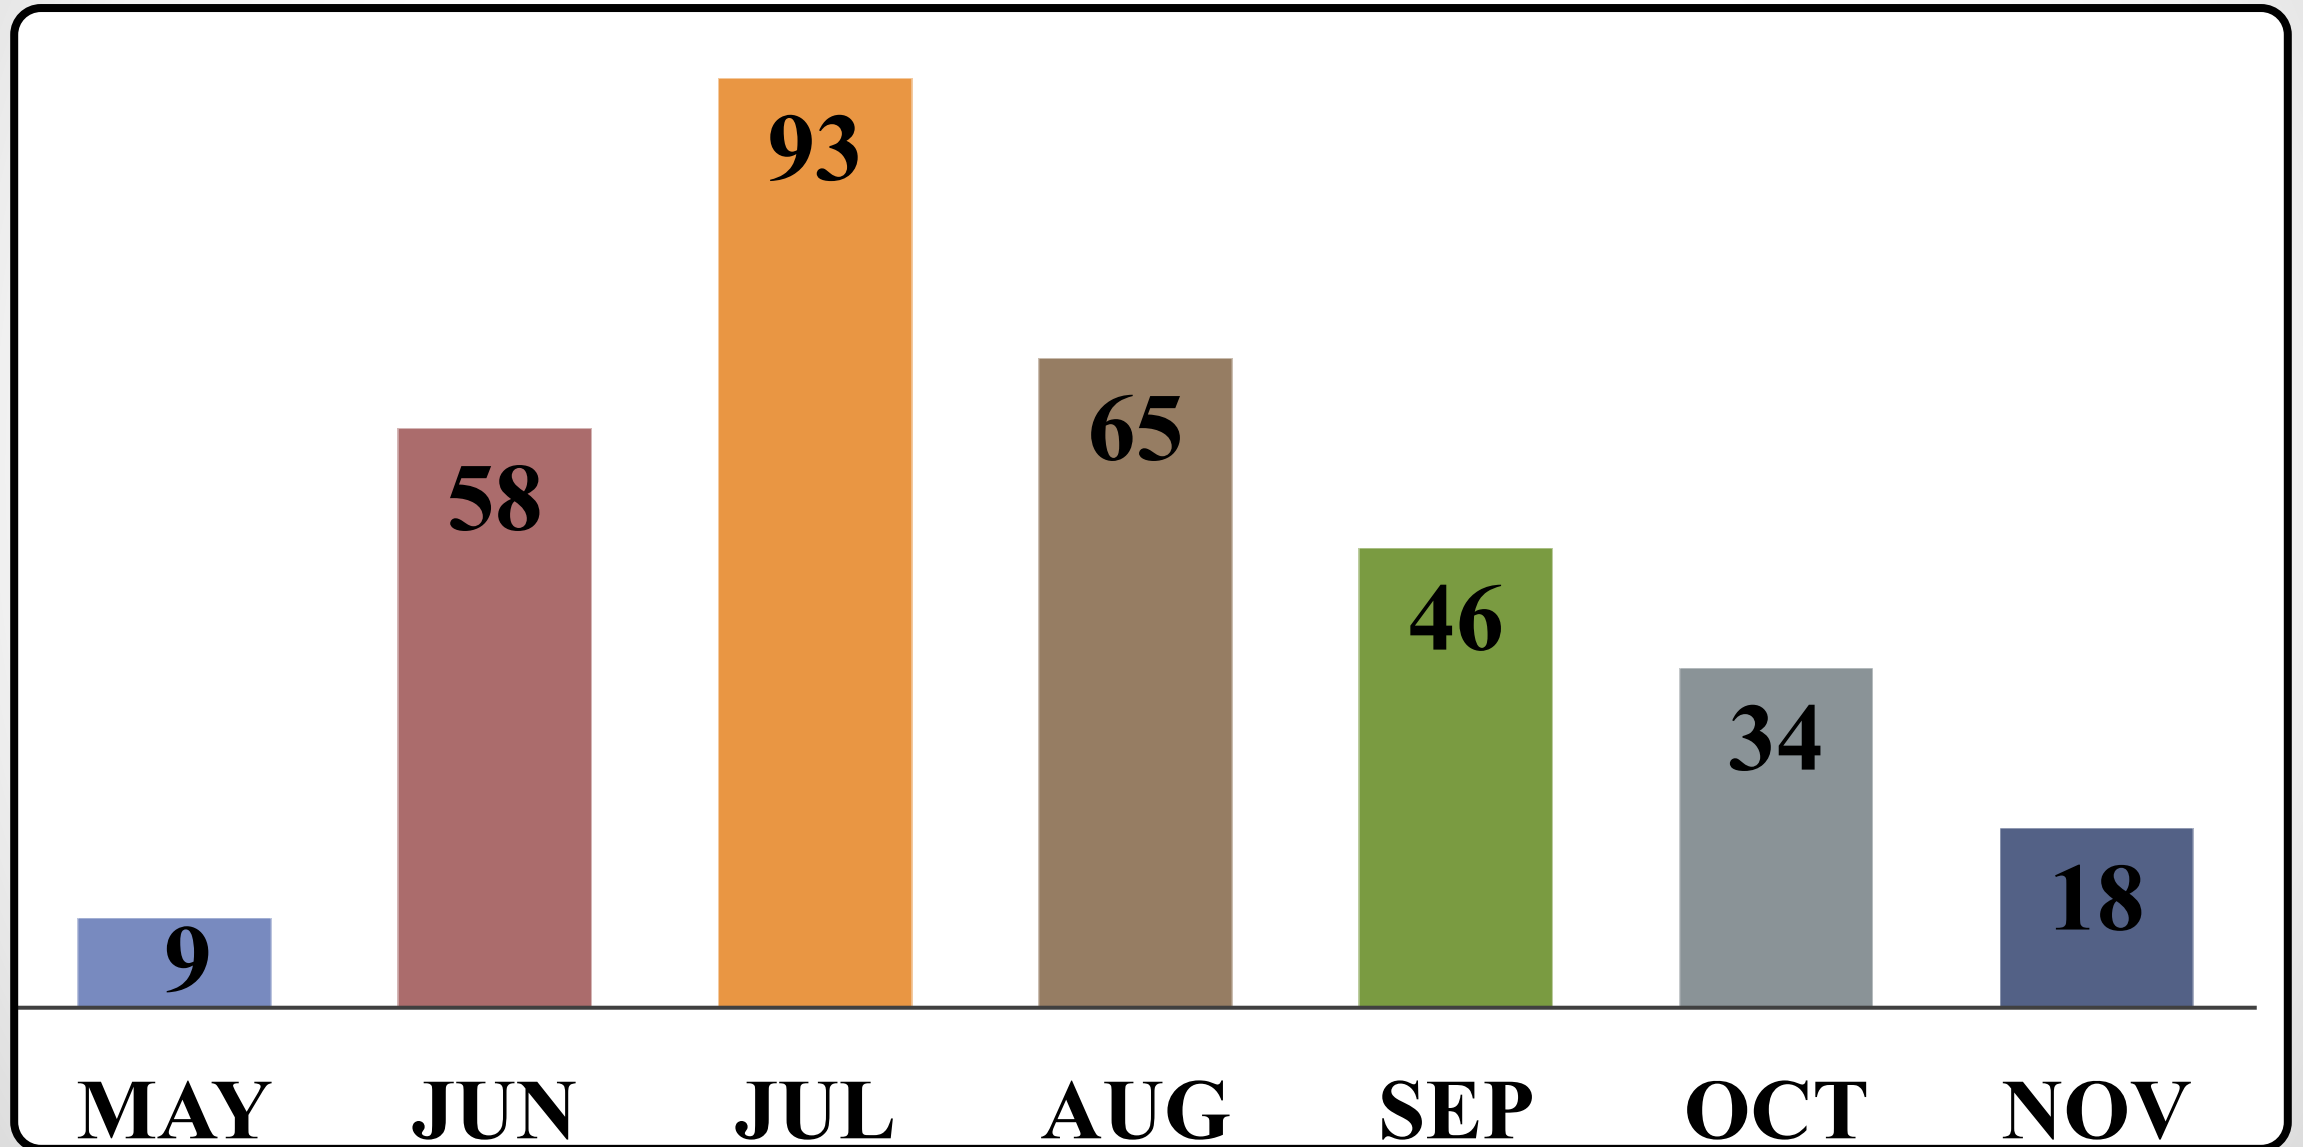

# Tropical waves distribution with respect to the formation zone

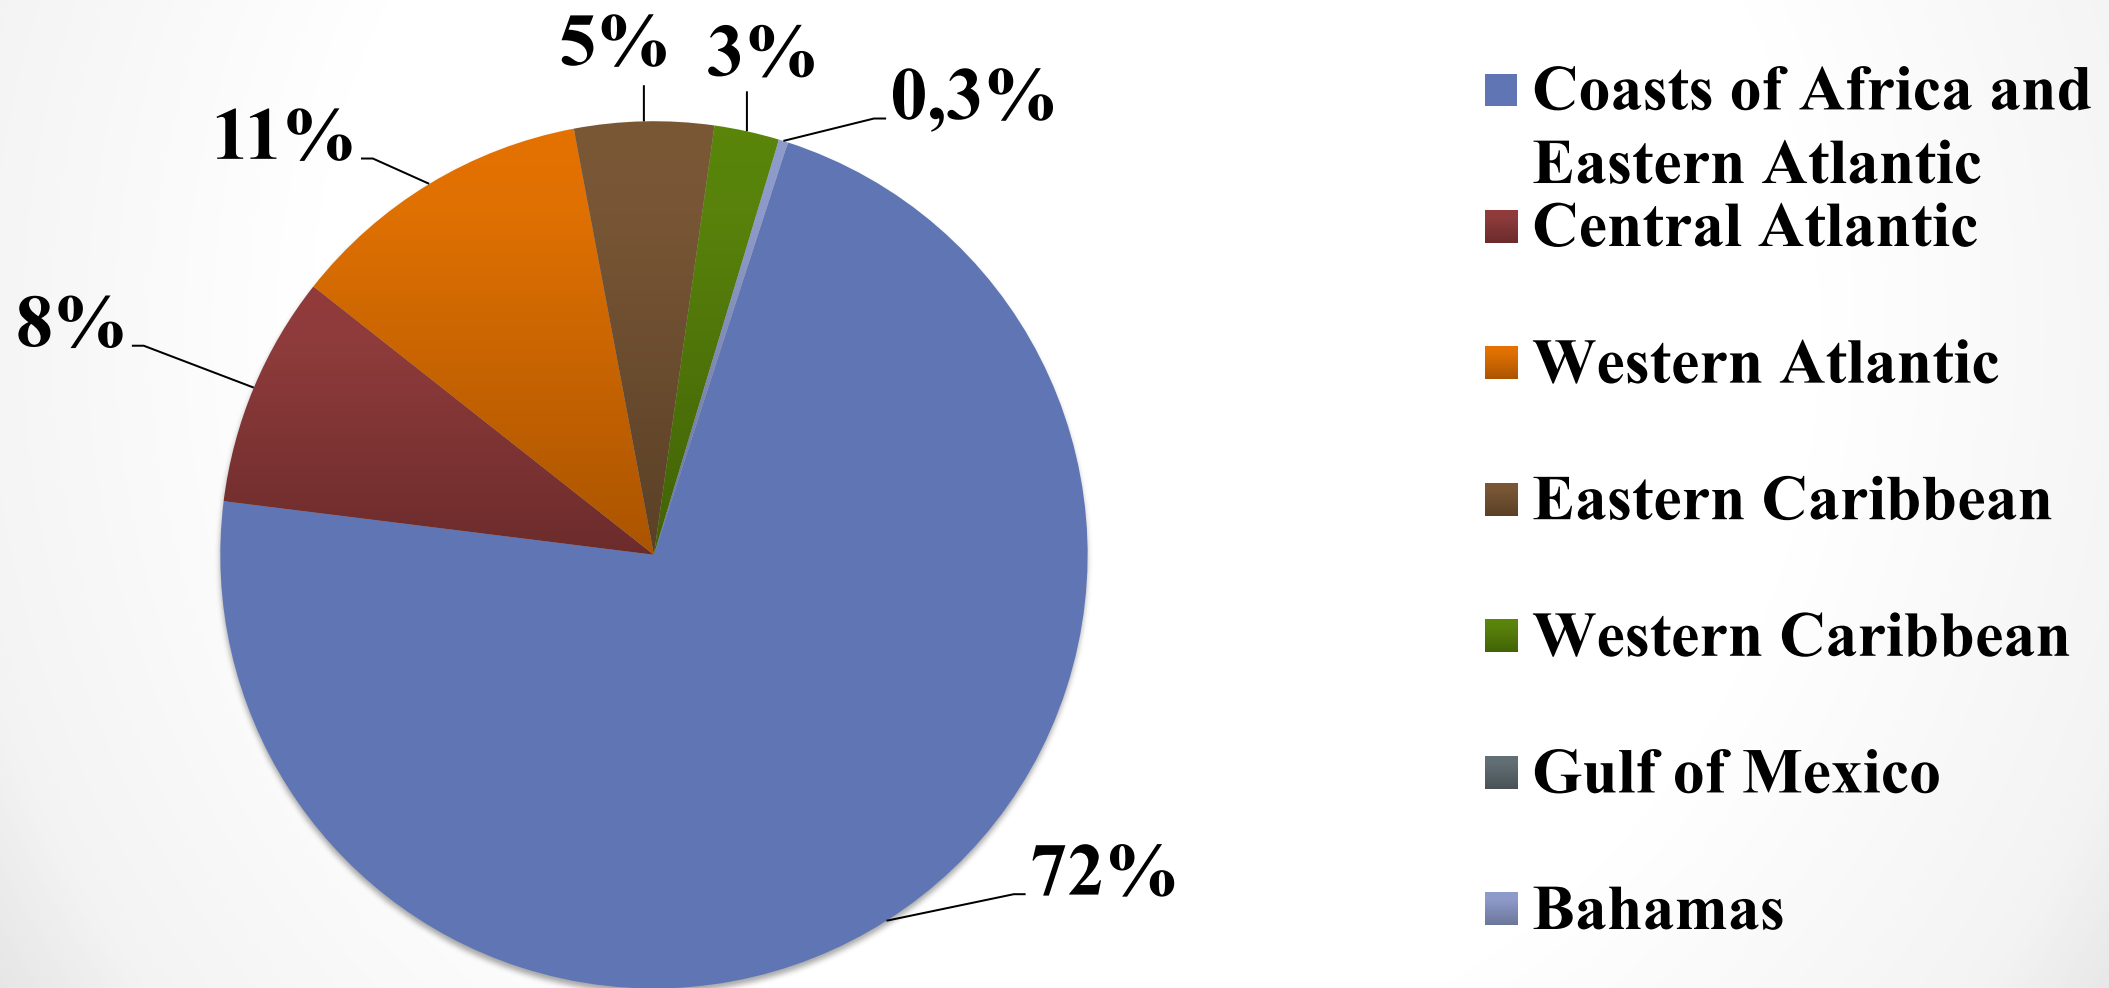

# Tables 1 and 2. Tropical waves that dissipated or intensified after passing through Cuba

| Year/DZ | 5  | 6  | 7 | Total |
|---------|----|----|---|-------|
| 2012    | 4  | 5  | 1 | 10    |
| 2013    | 1  | 1  | 0 | 2     |
| 2014    | 2  | 2  | 0 | 4     |
| 2015    | 2  | 0  | 0 | 2     |
| 2016    | 1  | 0  | 0 | 1     |
| 2017    | 0  | 0  | 0 | 0     |
| 2018    | 0  | 3  | 0 | 3     |
| 2019    | 2  | 0  | 0 | 2     |
| 2020    | 1  | 0  | 0 | 1     |
| Total   | 13 | 11 | 1 | 25    |
| %       | 52 | 44 | 4 | 100   |

1

| Year/IZ | 4    | 5  | 6    | Total |
|---------|------|----|------|-------|
| 2012    | 0    | 1  | 0    | 1     |
| 2013    | 0    | 1  | 1    | 1     |
| 2014    | 0    | 0  | 1    | 1     |
| 2015    | 0    | 0  | 0    | 0     |
| 2016    | 0    | 1  | 1    | 2     |
| 2017    | 0    | 2  | 1    | 3     |
| 2018    | 0    | 0  | 0    | 0     |
| 2019    | 0    | 0  | 0    | 0     |
| 2020    | 2    | 2  | 1    | 5     |
| Total   | 2    | 7  | 5    | 14    |
| %       | 13,4 | 50 | 35,7 | 100   |

2

# Annual analysis of the tropical waves in relation to the speed of traslation

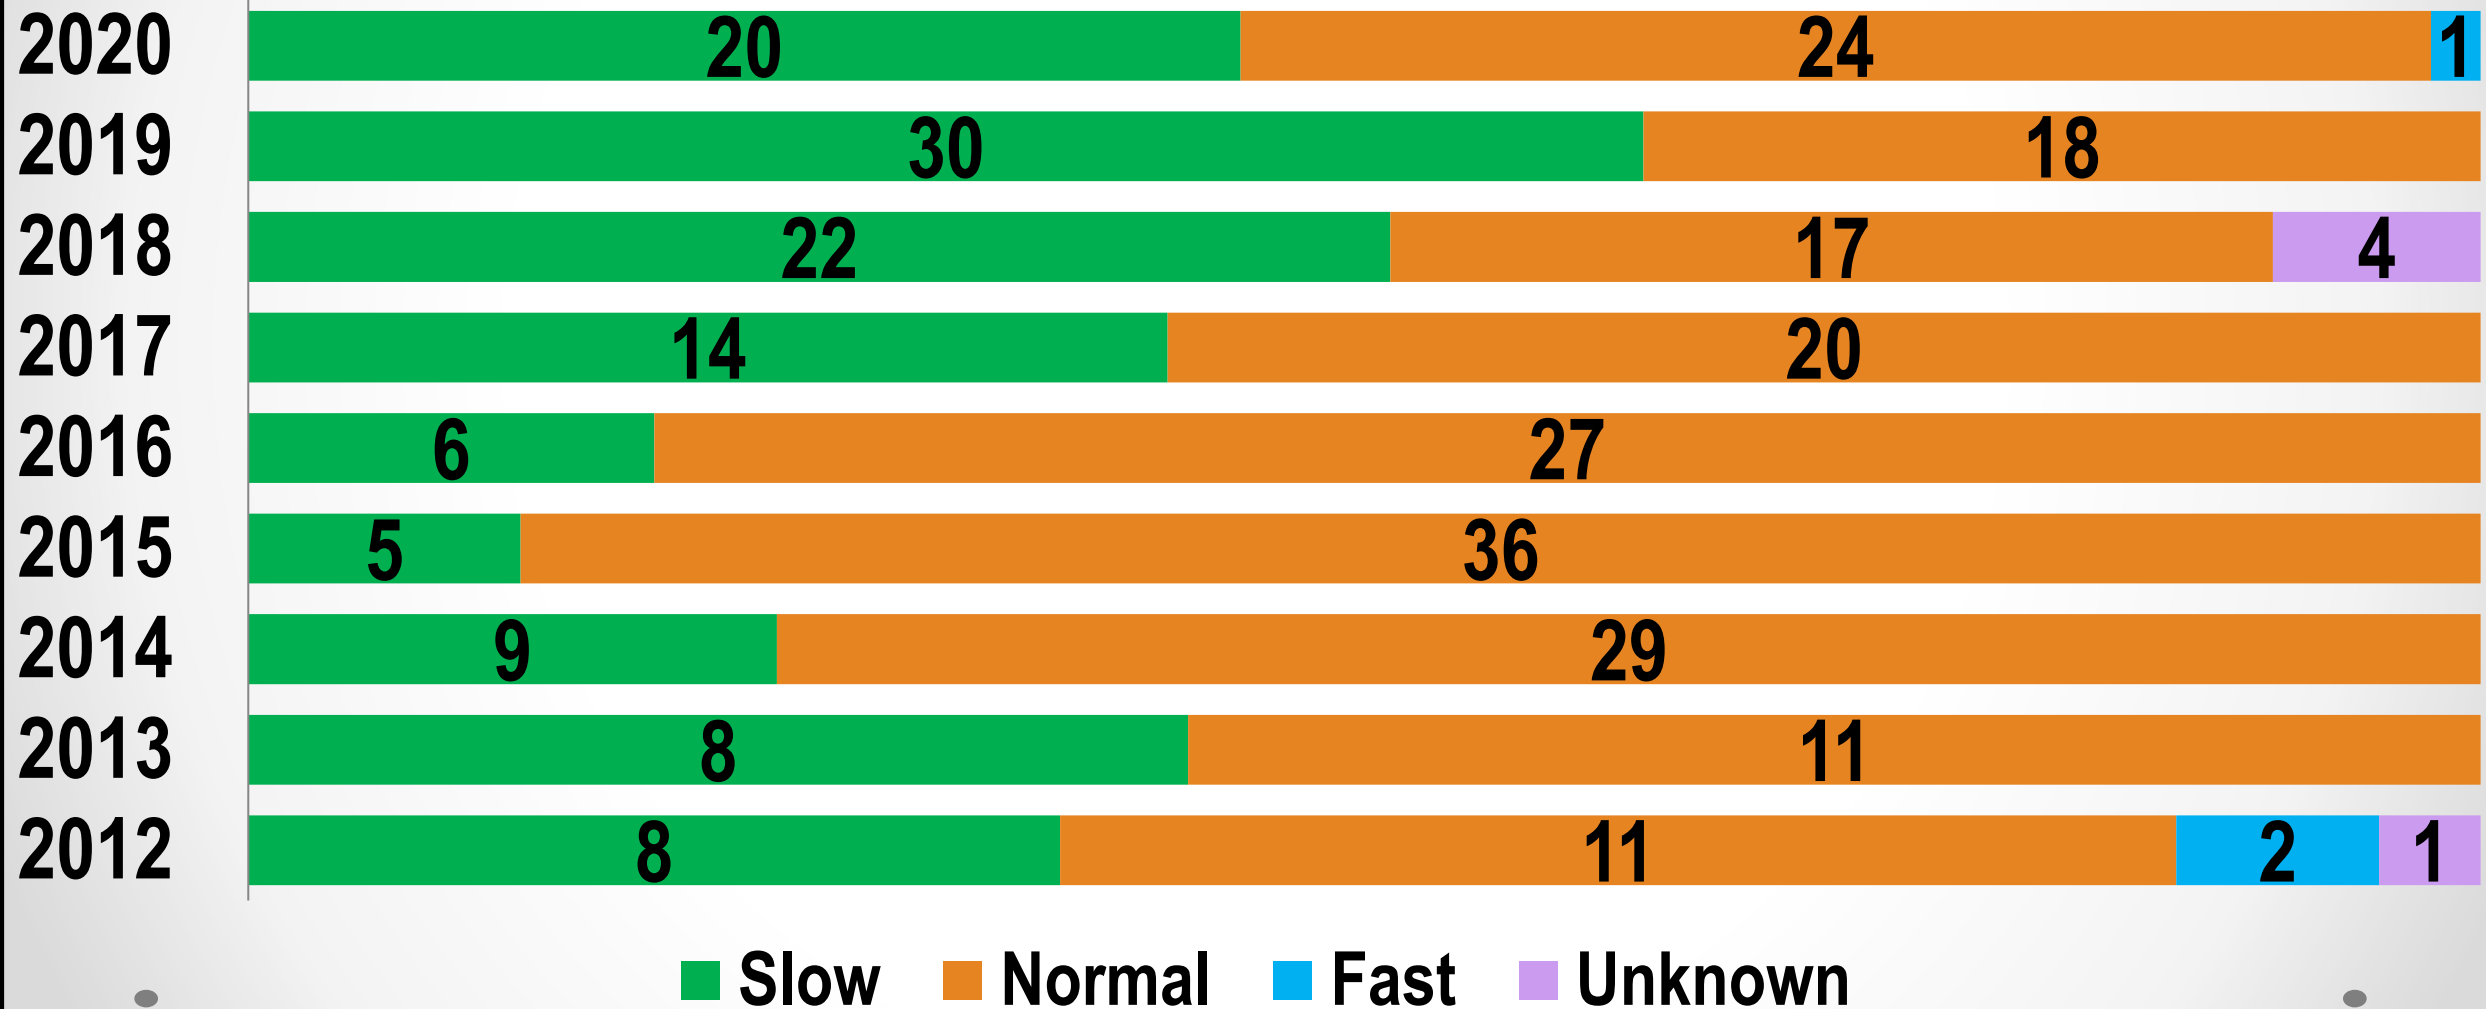



# Behavior of tropical waves in the Eastern and Western half of Cuba

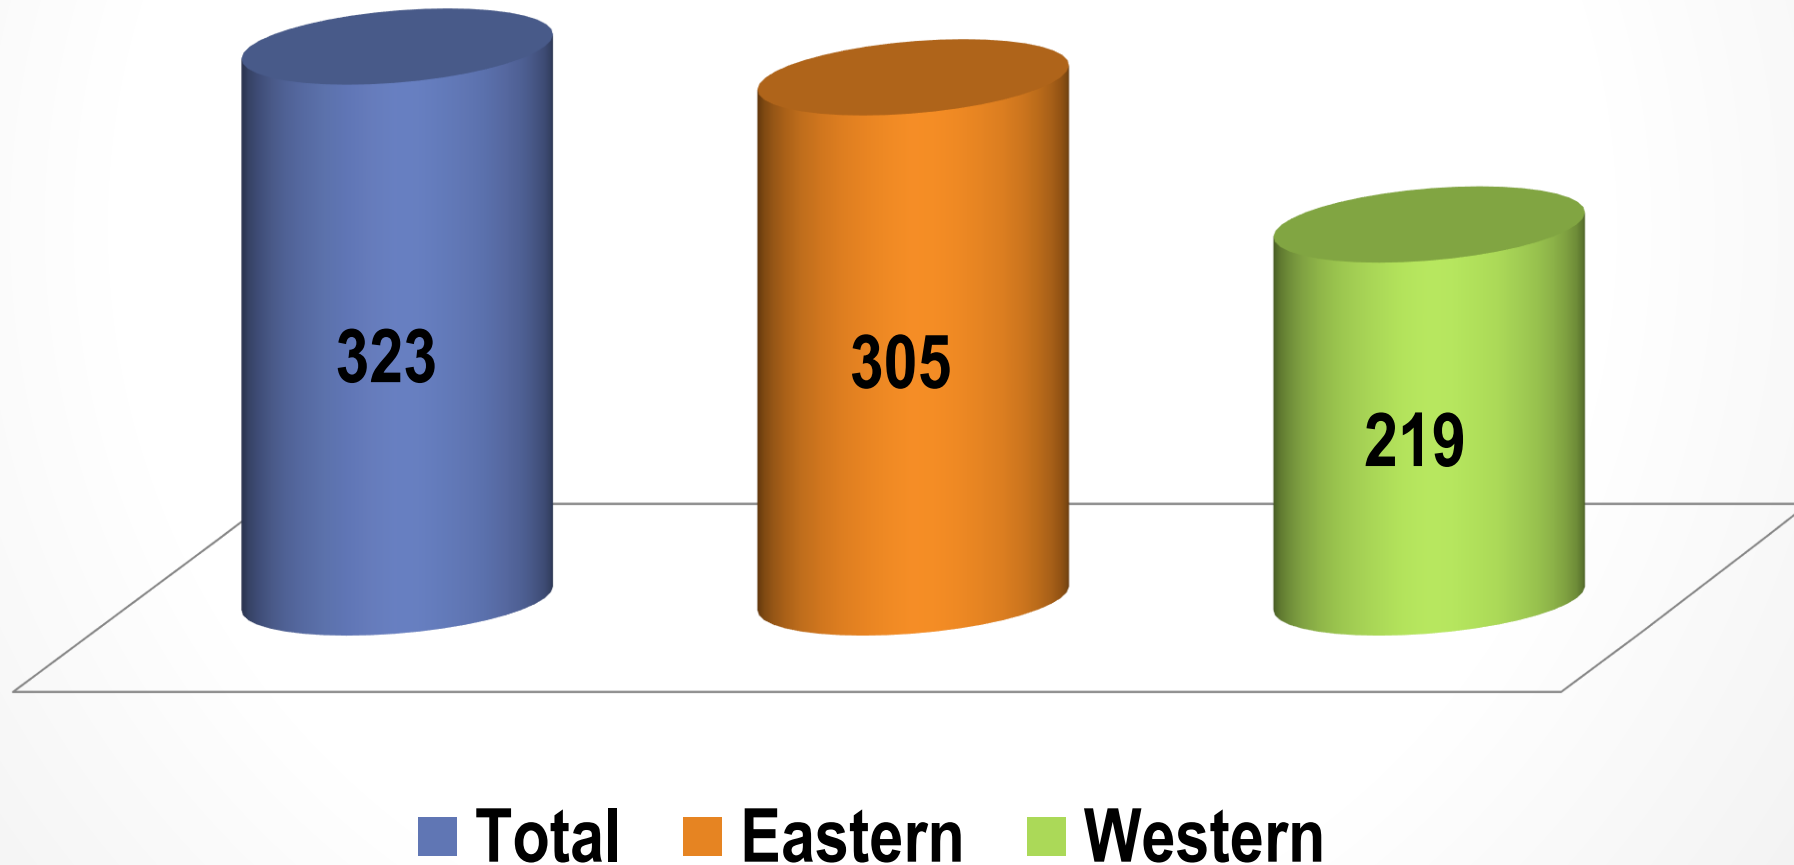

# Convective activity in the Eastern and Western half of Cuba

## Eastern

■ Active ■ Inactive

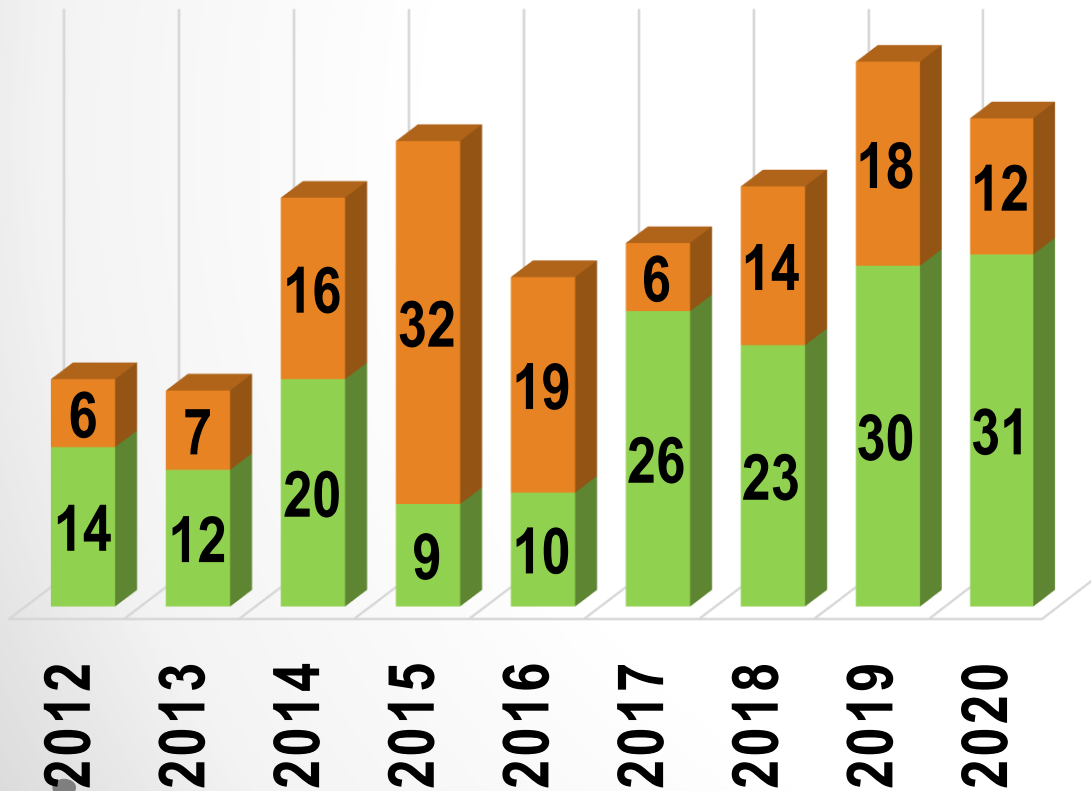

## Western

■ Active ■ Inactive

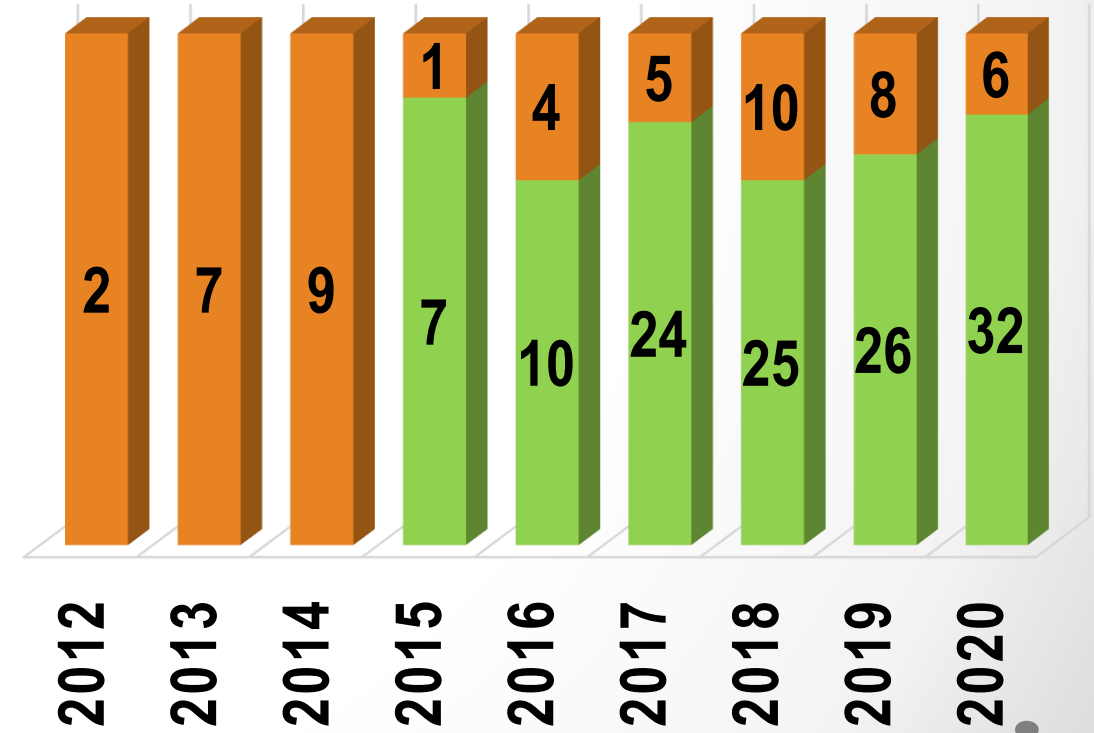

# Intense rains and associated severe phenomena

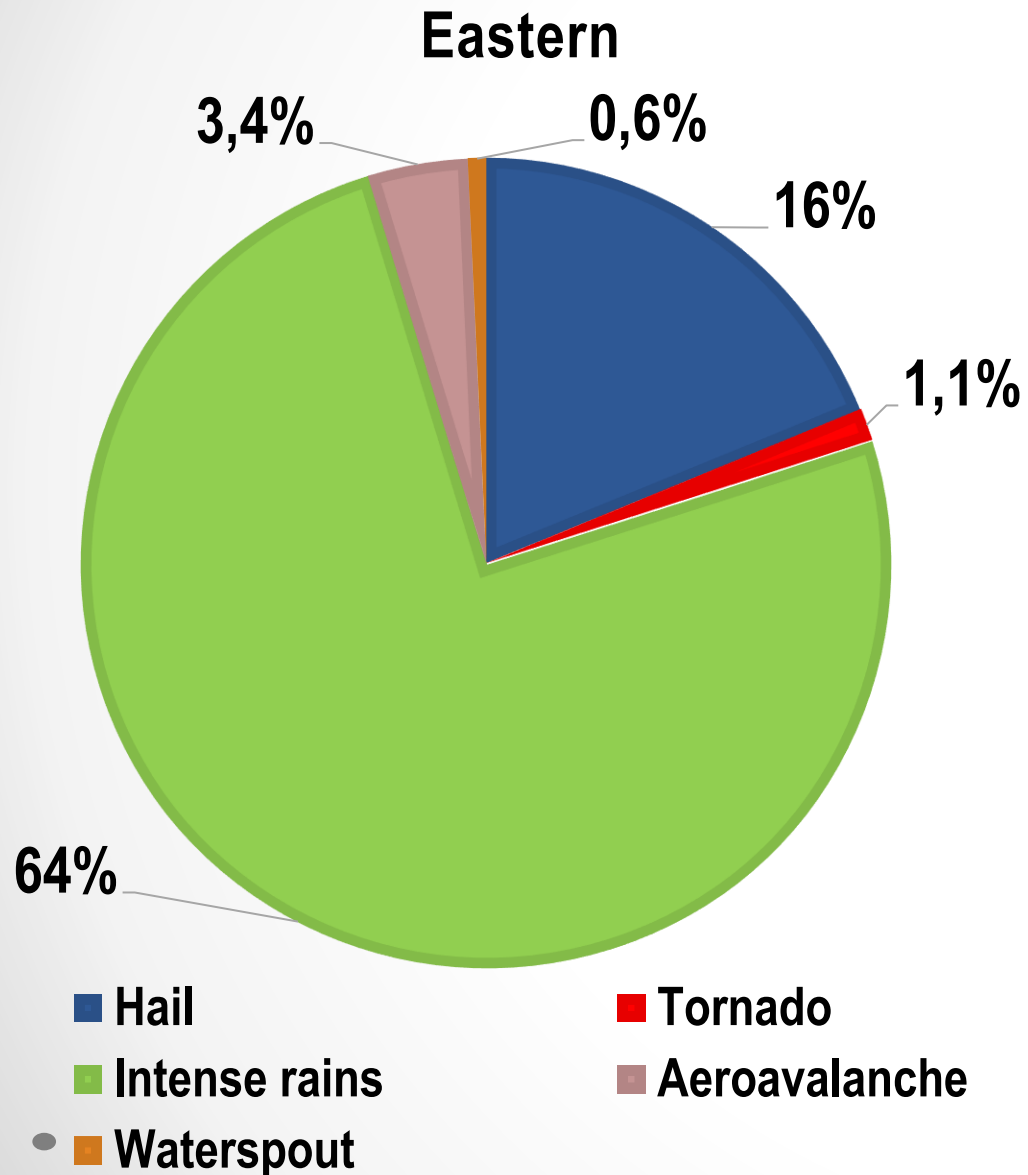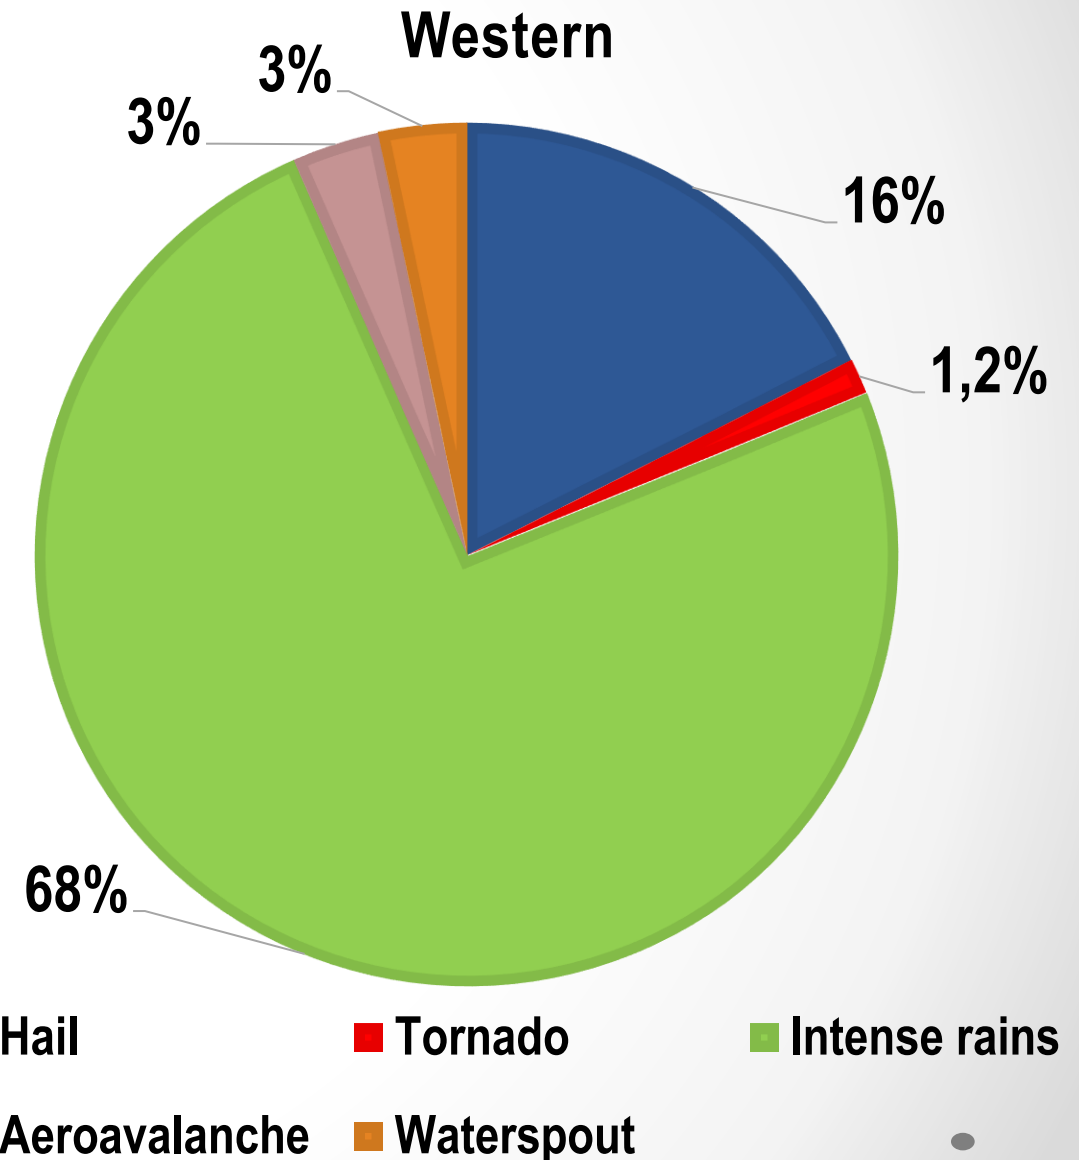

# Conclusions

- The study carried out on tropical waves in the period 2012-2020 gave a total of 579 tropical waves in the Atlantic basin, of which 323 passed through Cuba (representing 56% of the total), confirming that they are not only important in the possible formation of tropical cyclones, but by the accumulation of rain.
- More than 50% of the waves had their origin in the African and Eastern Atlantic coasts (zone 1), the most frequent being those that moved with “normal” speeds.
- Over the western Caribbean Sea, 52% of the tropical waves dissipated, after passing through Cuba, while 50% of the intensifications of these systems occurred in the same area.
- The transit of tropical waves through the archipelago presented severe phenomena and/or intense rains associated with "active" waves.
- In the years 2012-2020, the activity of tropical waves was 28% higher than that of the 2003-2011 period, a behavior that was reflected in the months of June-July-August with a difference of 21% compared to what was found in Añón (2012).





# **Tropical Waves and Their Transit through Cuba during the Period 2012-2020.**

**Authors:**

**Laura E. Guerra Rodríguez<sup>1</sup>**

*[laurardguez1999@gmail.com](mailto:laurardguez1999@gmail.com)*

**Miguel A. Hernández Martínez<sup>1</sup>**

*[miguel.hernandez@insmet.cu](mailto:miguel.hernandez@insmet.cu)*

**Evelio A. García Valdés<sup>1</sup>**

*[evelio.garcia@insmet.cu](mailto:evelio.garcia@insmet.cu)*

<sup>1</sup>**National Forecast Center, Meteorology Institute of Cuba, Casablanca Hill,  
Regla, 11700, Havana, Cuba**
