# Supplementary material
Source: MDPI journal article supplement (https://www.mdpi.com/2673-4931/19/1/27)
Supplement: s1 [file s1]

Archive with 1 entries (1 files):
- environsciproc-1907593-supplementary.pdf
